# Supplementary material for: Tetraspanin-8 promotes hepatocellular carcinoma metastasis by increasing ADAM12m expression
Source: PubMed Central journal article supplement (PMC5130032; doi:10.18632/oncotarget.9769), 2016-06-01
Supplement: oncotarget-07-40630-s001.pdf [file oncotarget-07-40630-s001.pdf]

## Tetraspanin-8 promotes hepatocellular carcinoma metastasis by increasing ADAM12m expression

### SUPPLEMENTARY TABLES

Supplementary Table S1: Primer sequences for qRT-PCR

| Gene name | sequence                                                          |
|-----------|-------------------------------------------------------------------|
| TSPAN8    | F: 5'CATCTCTCATTGACTTATCTGGTAGC3'<br>R: 5'ACGTCCCCCTAAGGTTTGGT3'  |
| MMP2      | F: 5'AAGTCTGAAGAGCGTGAAGTTTGGAG3'<br>R: 5'TGAGGGTTGGTGGGATTGGAG3' |
| MMP9      | F: 5'AGTCCACCCTTGTGCTCTTCCC3'<br>R: 5'TCTGCCACCCGAGTGTAACCAT3'    |
| ADAM12m   | F: 5'CACCATTGAAAACTAAGGTGTGTG3'<br>R: 5'GAGCCTGACAGGGTTGGAAG3'    |
| GAPDH     | F: 5'TGACTTCAACAGCGACACCCA3'<br>R: 5'CACCCTGTTGCTGTAGCCAAA3'      |

**Supplementary Table S2: Sequences for siRNA**

| <b>Sequences for TSPAN8 siRNA</b>  |                                                                  |
|------------------------------------|------------------------------------------------------------------|
| <b>Name</b>                        | <b>sequence</b>                                                  |
| Sequence-1#                        | F: 5'GUAUCUUGAUCCUAGCAUUdTdT3'<br>R: 5'AAUGCUAGGAUCAAGAUACdTdT3' |
| Sequence-2#                        | F: 5'GUCUGAUCGCAUUGUGAAUdTdT3'<br>R: 5'AUUCACAAUGCGAUCAGACdTdT3' |
| Sequence-3#                        | F: 5'GAGUUUAAAUGCUGCGGUdTdT3'<br>R: 5'AACCGCAGCAUUUAAACUCdTdT3'  |
| Control sequence                   | F: 5'UUCUCCGAACGUGUCACGUTT3'<br>R: 5'ACGUGACACGUUCGGAGAATT3'     |
| <b>Sequences for ADAM12m siRNA</b> |                                                                  |
| Sequence-1#                        | F: 5'CCUCGCUGCAAAGAAUGUGdTdT3'<br>R: 5'CACAUUCUUUGCAGCGAGGdTdT3' |
| Sequence-2#                        | F: 5'GACCUGATACGACUGCUGdTdT3'<br>R: 5'CAGCAGUCGUAUCAAGGUCdTdT3'  |
